# Supplementary material for: Microfluidic Detection of Adenylate Kinase as a Cell Damage Biomarker
Source: MDPI journal article supplement (doi:10.3390/chemosensors11040220), 2023-04-02
Supplement: s1 [file s1]

*Supplementary Materials*

# Microfluidic Detection of Adenylate Kinase as a Cell Damage Biomarker

**Cristiana Domingues <sup>1</sup>, Pedro Mendes Fontes <sup>1,2</sup>, Pedro G. M. Condelipes <sup>1</sup>, Vanda Marques <sup>2</sup>, Marta B. Afonso <sup>2</sup>, Virginia Chu <sup>1</sup>, Cecília M. P. Rodrigues <sup>2</sup> and João Pedro Conde <sup>1,3,\*</sup>**

<sup>1</sup> Instituto de Engenharia de Sistemas e Computadores-Microsistemas e Nanotecnologias (INESC MN), Rua Alves Redol 9, 1000-029 Lisbon, Portugal

<sup>2</sup> Research Institute for Medicines (iMed, ULisboa), Faculty of Pharmacy, Universidade de Lisboa, 1600-277 Lisbon, Portugal

<sup>3</sup> Department of Bioengineering, Instituto Superior Técnico, Universidade de Lisboa, Av. Rovisco Pais 1, 1049-001 Lisbon, Portugal

\* Correspondence: joao.conde@tecnico.ulisboa.pt

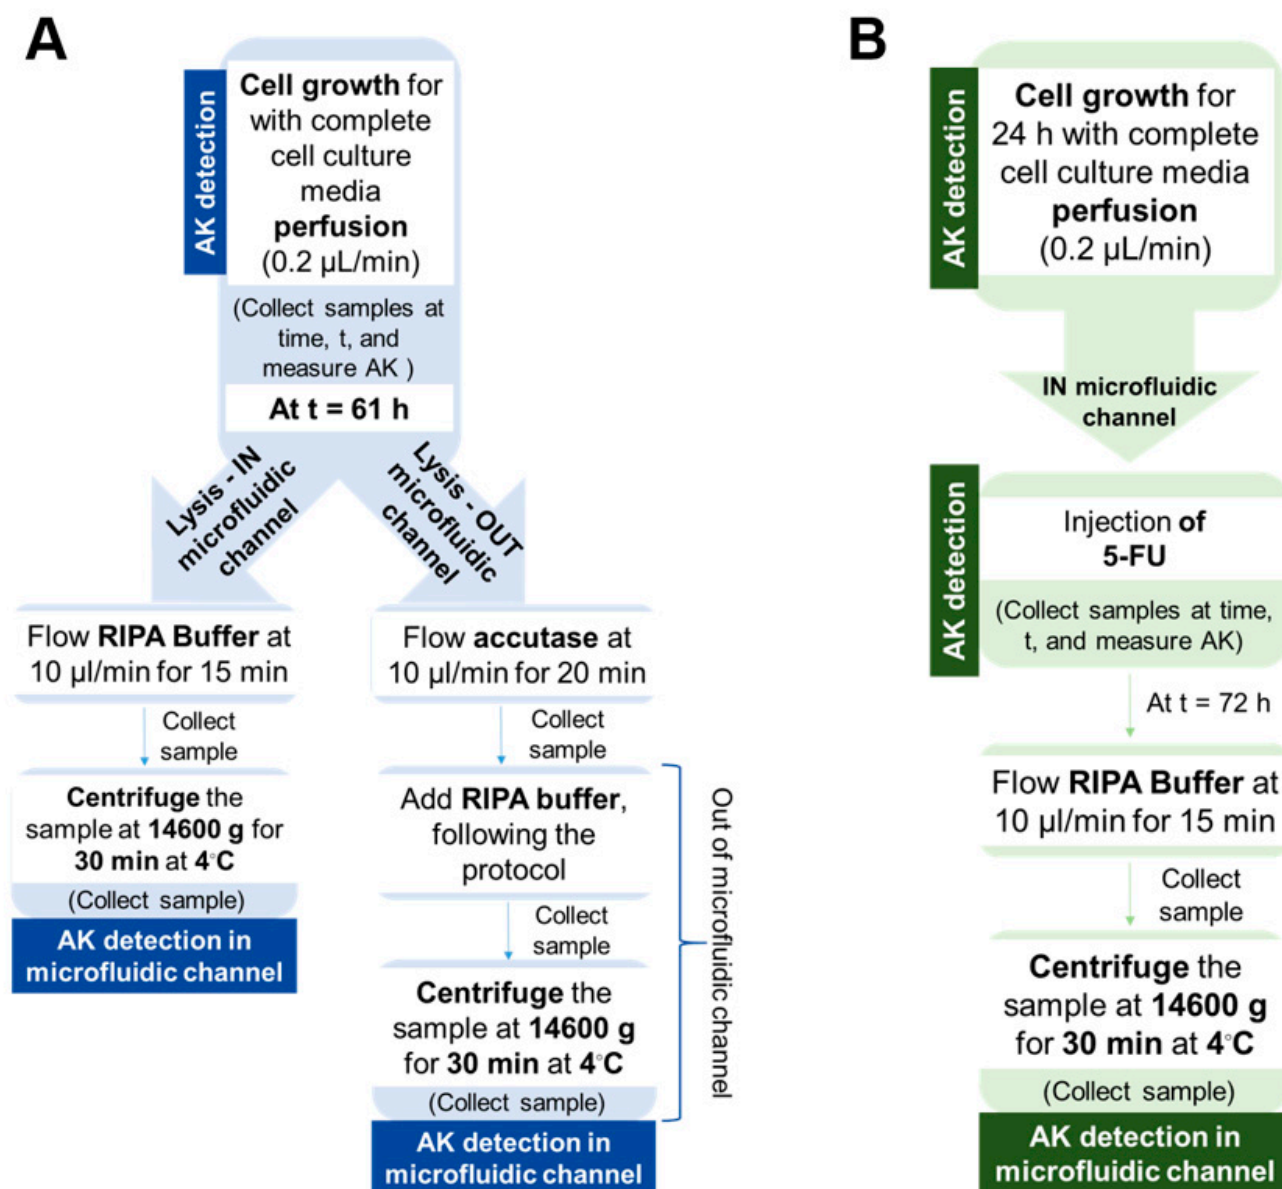

**Figure S1.** Detection of AK resulting from cell damage in cell chips. Two different procedures were performed: **(A)** Cell growth + RIPA lysis in the microfluidic cell culture chamber. **(B)** Cell growth + 5-FU + RIPA lysis in the microfluidic cell chamber.

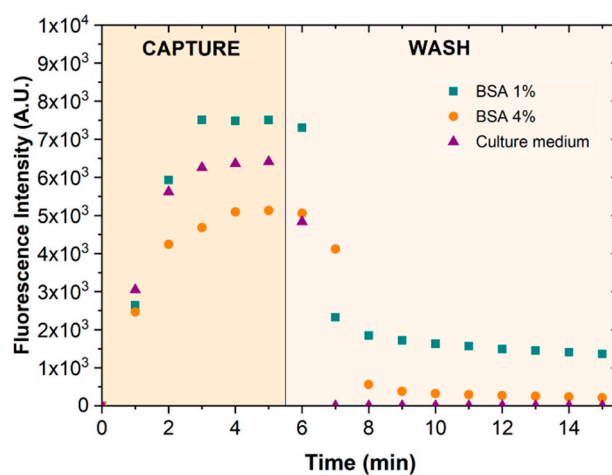

**Figure S2.** Optimization performed related with blocking agent, using  $[AK] = 0 \mu\text{M}$  (absence) and  $[\text{anti-AK antibody}] = 1 \text{ mg/mL}$ .
